# Supplementary material
Source: PubMed Central journal article supplement (PMC7703795)

**Supplement F1 related to Fig.1 Crotonic acid decreases the level of wild type p53 protein.**

Crotonic acid does not reduce the p53 mRNA level in H460 lung cancer cells. H460 cells were treated with different doses of crotonic acid (CA) and harvested at 24 and 48 hrs post treatment for Q-PCR to detect p53 mRNA levels.

**Supplement F2 related to Fig.2**

(A) The schematic of the functional domains and mutated residues of p53-K24R and p53-4M. (B) The schematic of the functional domains and mutated residues of p53-8KR. (C) p53-8KR is crotonylated. WT p53 and p53-8KR plasmids were introduced into HCT116<sup>p53<sup>-/-</sup></sup> cells. Cells were harvested for IP-IB with indicated antibodies. (D) The blast of p53 family of p53, p63 and p73 of p53 S46 amino acid region. (E) Crotonylation reactions were performed with WT and S46A(SA) His p53 beads in the presence and absence of p300 and HEK293 lysate. Crotonylation was detected using Pan Anti-crotonyllysine antibody in the in vitro reaction. (F) Serine 46 of p53 is not conserved in species. Serine 46 of p53 only presents in *H.sapiens*, *P.troglodytes* and *M.mulatta*.

**Supplement F3 related to Fig.2**

(A) Diagram of serine phosphorylation. (B) Diagram of serine Crotonylation. (C) CA reduces the p53 protein is independent on MDM2. Human p53 and MDM2 plasmids were introduced into MEF<sup>p53<sup>-/-</sup> MDM2<sup>-/-</sup></sup> cells. Cells were harvested for IP-IB with indicated antibodies. (D) CA reduces the p53 protein is independent on MDM2 mediated ubiquitination. Human p53, MDM2 and His-Ub plasmids were introduced into MEF<sup>p53<sup>-/-</sup> MDM2<sup>-/-</sup></sup> cells. Cells were harvested for Ubiquitination and IB assays with indicated antibodies.

**Supplement F1 related to Fig. 1**

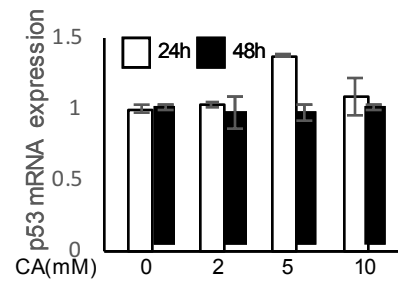

Supplement F2 related to Fig. 2

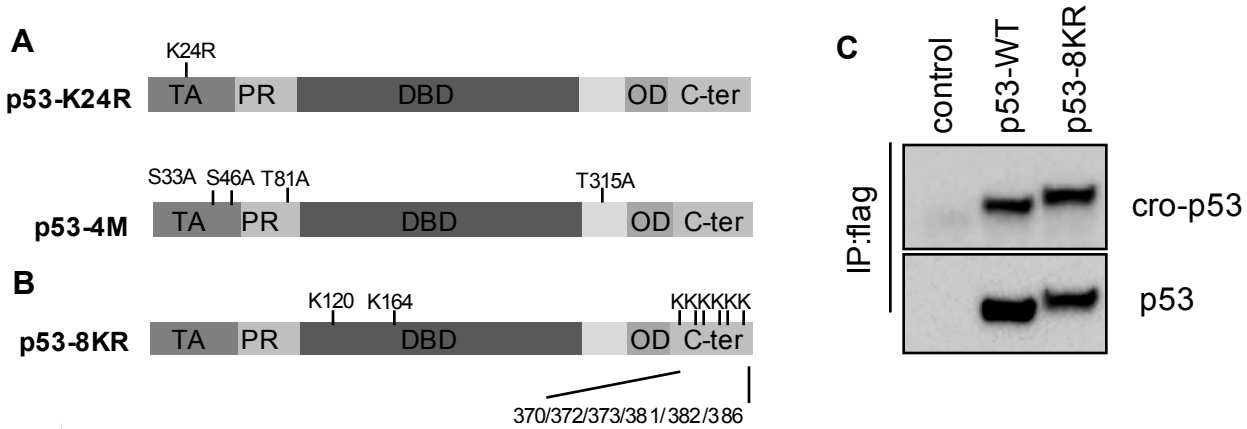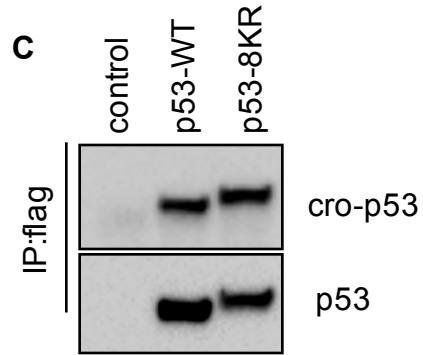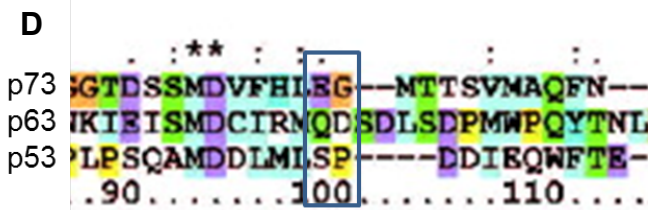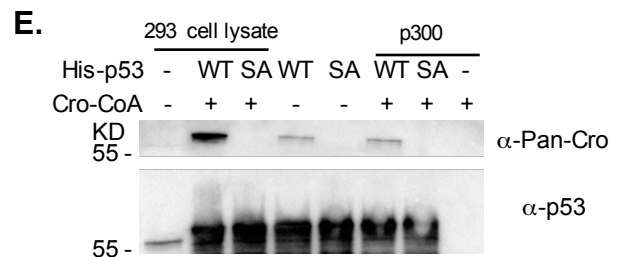

**F**

| Organism      |   |                                                                    |    |
|---------------|---|--------------------------------------------------------------------|----|
| H.sapiens     | 1 | ---MEEPQSDPSVEPPLSQETFSDLWKLPPENNVLSPL---                          | 44 |
| P.troglodytes | 1 | ---MEEPQSDPSVEPPLSQETFSDLWKLPPENNVLSPL---                          | 44 |
| M.mulatta     | 1 | ---MEEPQSDPSIEPPLSQETFSDLWKLPPENNVLSPL---                          | 44 |
| C.lupus       | 1 | ---MEESQSELNIDPPLSQETFSELWNLLPENNVLSSE---                          | 44 |
| B.taurus      | 1 | ---MEESQAE LNVEPPLSQETFSDLWNLLPENNVLSSE---                         | 44 |
| M.musculus    | 1 | MTAMEESQSDISLELPLSQETFSGLWKLPPEDILP---                             | 45 |
| R.norvegicus  | 1 | ---MEDSQSDMSIELPLSQETFSC L WKLPPDDILPTTATGSPNSMEDLF                | 47 |
| D.erio        | 1 | -----MAQNDSQEF AELWEKNLISI QPP-----                                | 32 |
| X.tropicalis  | 1 | ----MEP SSETGM E P P L S Q E T F E D L W S L L P D P L Q - T ----- | 40 |

  

| Organism      |    |                                                                                              |    |
|---------------|----|----------------------------------------------------------------------------------------------|----|
| H.sapiens     | 45 | LSPODIEQWFTEDPGPDEAPRMPEAAAPPVAPAPAAFTPAAPAPAPSWPLS                                          | 94 |
| P.troglodytes | 45 | LSPODIEQWFTEDPGPDEAPRMPEAAAPPVAPAPAAFTPAAPAPAPSWPLS                                          | 94 |
| M.mulatta     | 45 | LSPODLAQLWLTEDPGPDEAPRMSEAAAPPMAPTPAAPTTPAAPAPAPSWPLS                                        | 94 |
| C.lupus       | 45 | L-PESV V N W L D E D --- S D D A P R M ----- P A T S A P T A P G P A P S W P L S             | 81 |
| B.taurus      | 45 | P-YTDVATWLDEC--PNEAPQMPEPSA-----PAAPPPATPAPATSWPLS                                           | 86 |
| M.musculus    | 46 | L-PQDV E E F F E G --- P S E A L R V S G A P A A Q D P V T E T P G P V A P A P A T P W P L S | 91 |
| R.norvegicus  | 48 | L-PQDV A E L L E G --- P E E A L Q V S - A P A A Q E P G T E A P A P V A P A S A T P W P L S | 92 |
| D.erio        | 33 | ----NDEEYLP G S F D P N F F E N V L E E Q P Q P S T L P -- P ----- T                         | 63 |
| X.tropicalis  | 41 | ----E F S E Y --- P L A P D M -- T V L Q E G L M G N T V P T V T ----- S                     | 68 |

Supplement F3 related to Fig. 2

**A** Phosphorylation on Serine

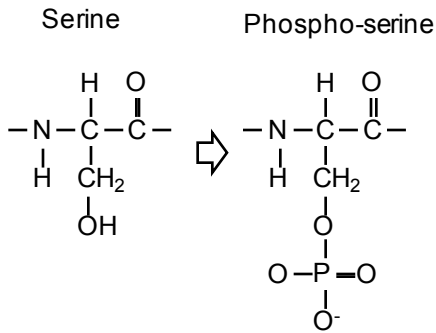

Classic modification

**B** Crotonylation on Serine

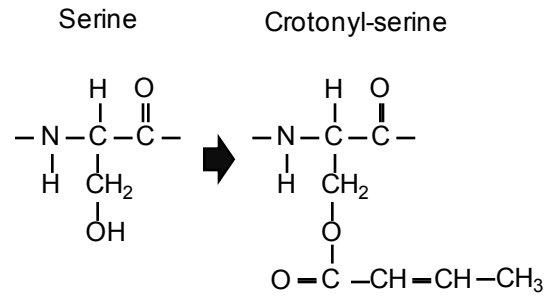

Specific modification

**C**

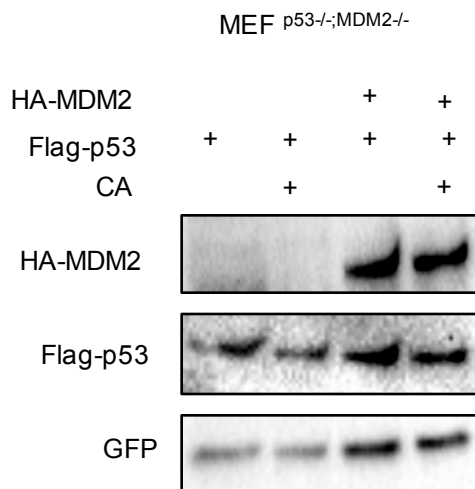

**D**

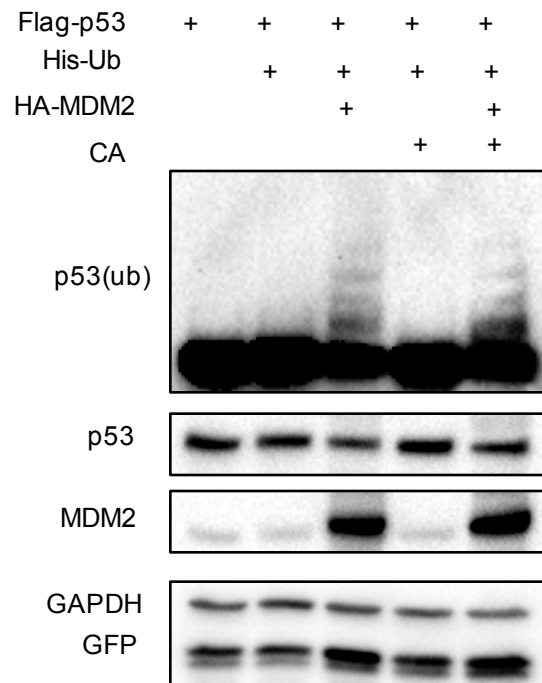

Supplement: NIHMS1643564-supplement-Supplemental_Material.pdf [file NIHMS1643564-supplement-Supplemental_Material.pdf]
